# Supplementary material for: Lgr6+ stem cells and their progeny in mouse epidermis under regimens of exogenous skin carcinogenesis, and their absence in ensuing skin tumors
Source: PubMed Central journal article supplement (PMC5349950; doi:10.18632/oncotarget.13436), 2016-11-17
Supplement: oncotarget-07-86740-s001.pdf [file oncotarget-07-86740-s001.pdf]

## Lgr6+ stem cells and their progeny in mouse epidermis under regimens of exogenous skin carcinogenesis, and their absence in ensuing skin tumors

### SUPPLEMENTARY INFORMATION

#### METHODS

##### Active Caspase-3 Staining

Cryosections were cut at 6  $\mu\text{m}$  thickness and fixed in acetone containing 0.3%  $\text{H}_2\text{O}_2$ . The sections were blocked with 2% Normal Human Serum (NHS) for 20 minutes. After blocking, the sections were incubated overnight at 4°C with anti-active caspase-3 (1:100, ab 2302, 3509322, Abcam, Cambridge, UK). The next day the sections were

incubated for one hour with Goat-anti-Rabbit (IgG)-biotin (1:300, Vector Laboratories, Inc Burlingame, USA) followed by streptavidin (1:100, RPN1051v, GE Healthcare UK Limited) for 45 minutes. The staining was visualized with 20 mg 3,3'-Diaminobenzidine (D5905, Sigma-Aldrich, Zwijndrecht, The Netherlands) in 100ml of PBS and 100  $\mu\text{l}$  of  $\text{H}_2\text{O}_2$ . Sections were counterstained with haematoxylin and mounted in Kaisers' glycerin.

### SUPPLEMENTARY FIGURES AND TABLES

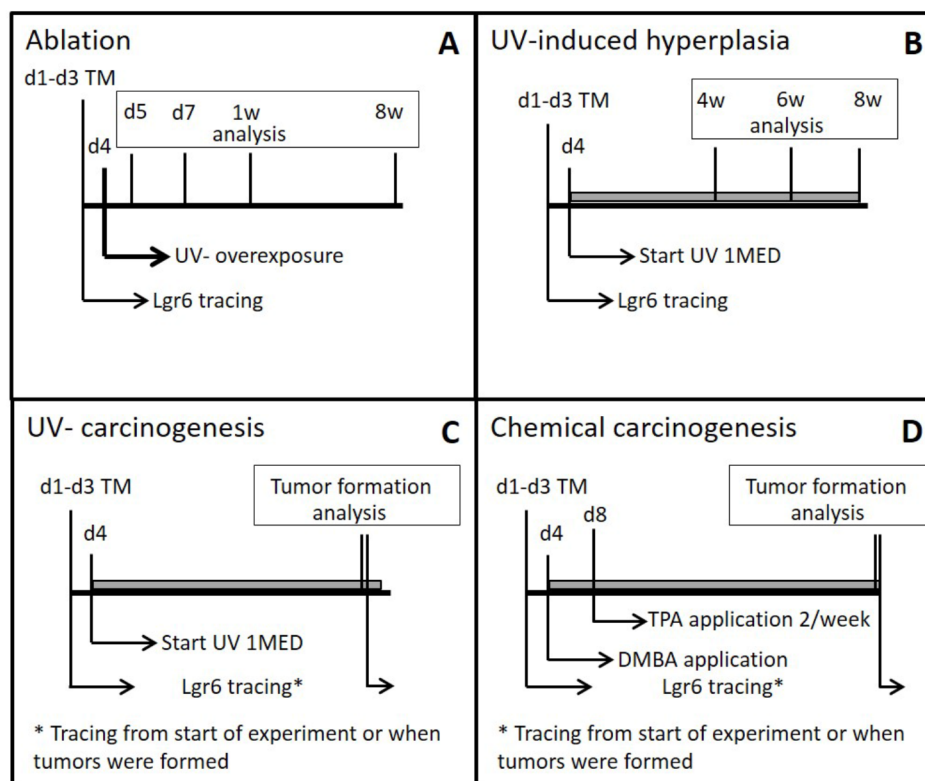

**Supplementary Figure S1: Experimental outline.** Time lines of the experiments including time points of sample collection for analyses. TM= tamoxifen injection, d= day, w=week. In experiments **A** and **B**, the lineage tracing started at the beginning of the experiment. In experiment **C** and **D**, the tracing started either at the start of the experiment or when tumors were formed.

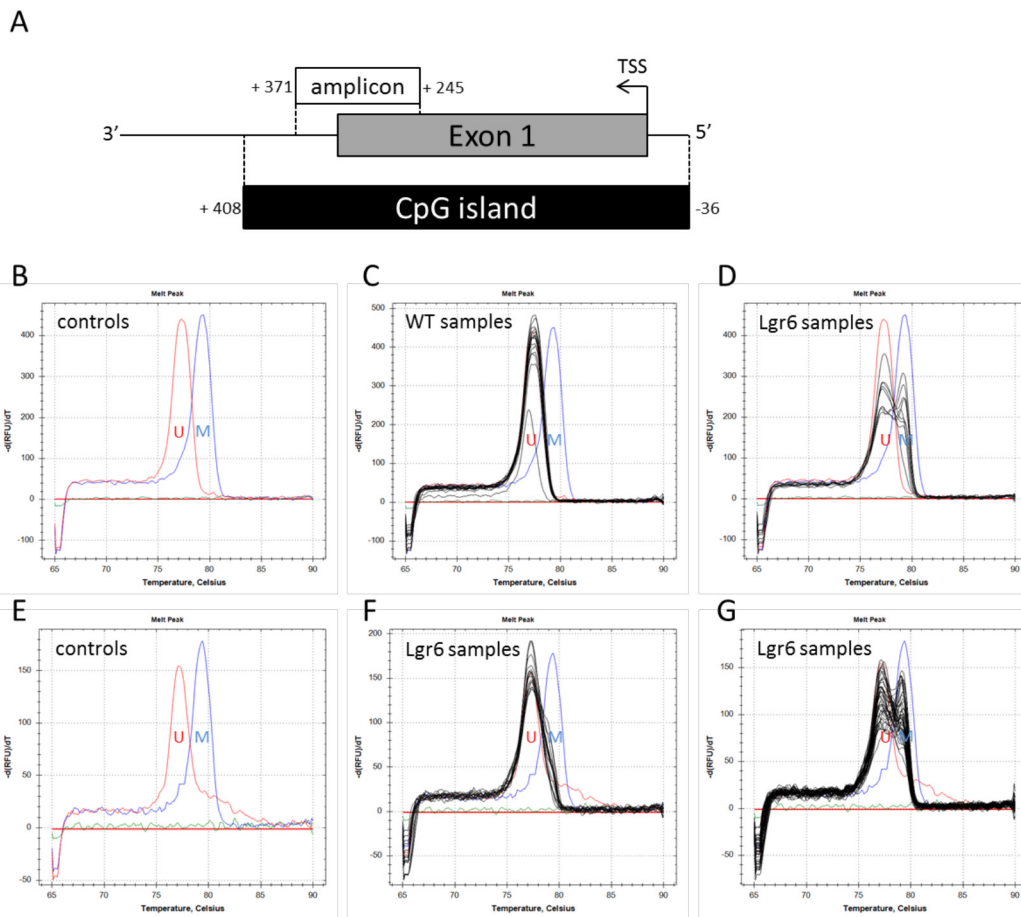

**Supplementary Figure S2: Methylation-specific melting curve analysis (MS-MCA).** A Schematic depiction of the CpG island in relation to the promoter and gene body and amplicon for MS-MCA relative to the transcription start site (TSS) of *Lgr6* **A**. MS-MCA on methylation control samples resulting in a melting temperature of 77.4 °C for unmethylated (U) and 79.4 °C for methylated (M) bisulphite converted DNA (B+E). In the first experiment **B-D**, samples from *Lgr6* transgenic mice (**D**) and mice with only wildtype (wt) *Lgr6* loci were tested (**C**). The wt samples were all unmethylated, however several *Lgr6* samples showed aberrant promoter methylation, demonstrated by the presence of both a methylated as well as an unmethylated fraction. In a second experiment only *Lgr6* samples were tested **E-G**, 15 out of 54 were unmethylated (**F**) and 39 out of 54 showed aberrant methylation (**G**). See also supplementary table S2 for the tested samples.

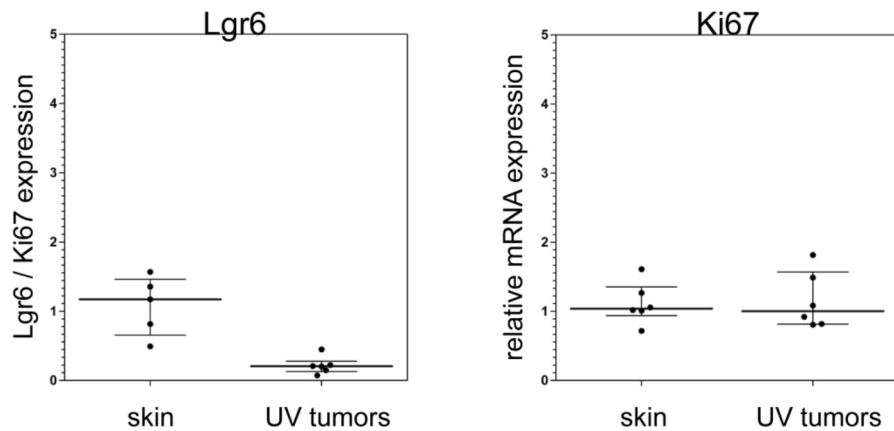

**Supplementary Figure S3: Normalized *Lgr6* and *Ki67* expressions in wildtype SKH mice.** Left panel: ratio of *Lgr6* expression over *Ki67* expression. Right panel: normalized *Ki67* expression (proliferating cells). Relative *Ki67* expression was equal in tumors induced by UV and in skin (untreated and hyperplastic skin) samples. However, *Lgr6* expression was significantly reduced in tumors ( $p=0.004$ , Mann-Whitney test). Lines depict median with interquartile range.

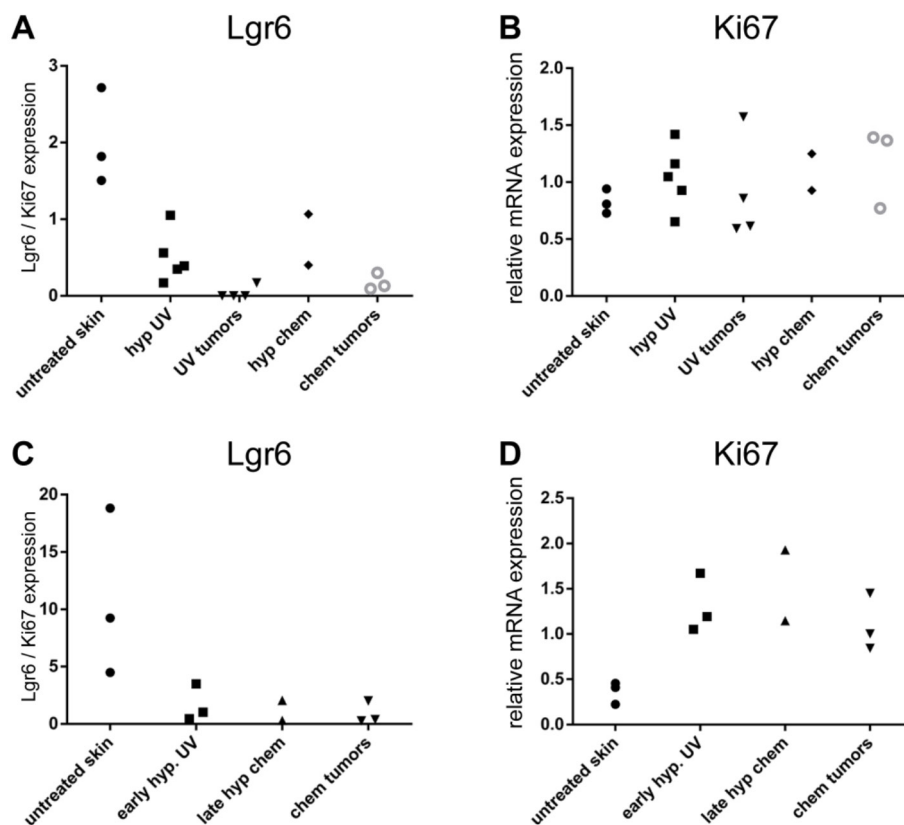

**Supplementary Figure S4: Normalized *Lgr6* and *Ki67* expressions in hairless A+B. and haired C+D. *Lgr6* mice.** The expression of *Lgr6* in each sample was divided by the corresponding expression of *Ki67* (A+C). Tumors and skin samples showed a similar expression of *Ki67* in hairless mice (B), while in haired mice the *Ki67* expression in untreated skin was reduced compared to the other samples (D). In hairless mice the *Lgr6* expression relative to the *Ki67* expression in UV tumors was lower than in untreated skin, though not statistically significant ( $p=0.057$ , Mann-Whitney test). In chemically induced tumors and hyperplasia samples compared to untreated skin this expression was significantly reduced ( $p=0.036$ ). In haired mice the ratio of *Lgr6* over *Ki67* expression in untreated skin was higher than in chemically induced late hyperplasia and chemo tumors ( $p=0.036$ ).

Supplementary Table SI: Primers for methylation assay

| Gene        | Primer sequence (5'-> 3')                                              | Amplicon size | Number of CpG's | Relative to TSS | Tm unmethylated amplicon | Tm methylated amplicon |
|-------------|------------------------------------------------------------------------|---------------|-----------------|-----------------|--------------------------|------------------------|
| <i>Lgr6</i> | GGTATTAGTAGGTGA<br>GTATTTATAGGTAAG<br><br>ACTCCCTACCAC<br>TACCAAAAAAAC | 127 bp        | 6               | -36 to +408     | 77.4°C                   | 79.4°C                 |
| <i>Rosa</i> | GGTGTAATGGTGT<br>GTAAAGGTAGTTG<br><br>CCTAAATCAAATA<br>AAAATCCAACAAA   | 192 bp        | 8               | -684 to -493    | 78.8°C                   | 80.6°C                 |

Supplementary Table SII: Samples tested for promoter hypermethylation

| sample group                                                                                        | # tested (n) | # Aberrantly methylated Lgr6 promoter (n) | % samples aberrantly methylated |
|-----------------------------------------------------------------------------------------------------|--------------|-------------------------------------------|---------------------------------|
| Skin untreated (C57BL/6 mice)                                                                       | 5            | 0                                         | 0                               |
| skin untreated (SKH-1 mice)                                                                         | 2            | 0                                         | 0                               |
| skin untreated (haired <i>Lgr5-EGFP-Ires-CreERT2/R26R-LacZ</i> mice)                                | 3            | 0                                         | 0                               |
| skin untreated (haired <i>Lgr6-EGFP-Ires-CreERT2/R26R-LacZ</i> mice)                                | 8            | 3                                         | 38                              |
| skin untreated (hairless <i>Lgr6-EGFP-Ires-CreERT2/R26R-LacZ</i> mice)                              | 8            | 4                                         | 50                              |
| skin treated with UV 30 days 1 MED (SKH-1 mice)                                                     | 4            | 0                                         | 0                               |
| skin treated with UV 4-8 weeks 1 MED ( <i>haired Lgr6-EGFP-Ires-CreERT2/R26R-LacZ</i> mice)*        | 8            | 2                                         | 25                              |
| skin treated with UV 4-8 weeks 1 MED ( <i>hairless Lgr6-EGFP-Ires-CreERT2/R26R-LacZ</i> mice)*      | 6            | 4                                         | 67                              |
| skin treated with TPA 6 weeks ( <i>haired Lgr5-EGFP-Ires-CreERT2/R26R-LacZ</i> mice)                | 3            | 0                                         | 0                               |
| inter-tumoral skin UV-carcinogenesis ( <i>hairless Lgr6-EGFP-Ires-CreERT2/R26R-LacZ</i> mice)       | 4            | 3                                         | 75                              |
| inter-tumoral skin chemical carcinogenesis ( <i>haired Lgr6-EGFP-Ires-CreERT2/R26R-LacZ</i> mice)   | 6            | 6                                         | 100                             |
| inter-tumoral skin chemical carcinogenesis ( <i>hairless Lgr6-EGFP-Ires-CreERT2/R26R-LacZ</i> mice) | 6            | 5                                         | 83                              |
| Tumors: UV-carcinogenesis (SKH-1 mice)                                                              | 6            | 0                                         | 0                               |
| Tumors: UV-carcinogenesis ( <i>hairless Lgr6-EGFP-Ires-CreERT2/R26R-LacZ</i> mice)                  | 9            | 8                                         | 89                              |
| Tumors: chemical carcinogenesis ( <i>haired Lgr5-EGFP-Ires-CreERT2/R26R-LacZ</i> mice)              | 6            | 0                                         | 0                               |
| Tumors: chemical carcinogenesis ( <i>haired Lgr6-EGFP-Ires-CreERT2/R26R-LacZ</i> mice)              | 9            | 9                                         | 100                             |
| Tumors: chemical carcinogenesis ( <i>hairless Lgr6-EGFP-Ires-CreERT2/R26R-LacZ</i> mice)            | 9            | 9                                         | 100                             |

\*no significant difference between skin treated with UV of haired and hairless mice (p=0.28; fisher exact test)

Supplementary Table SIII: Primers used for qPCR

| Gene         | Primer sequence (5'-> 3')     | Amplicon size | Exonic Location | Accession No.  | Amplification efficiency | Correlation (R <sup>2</sup> ) |
|--------------|-------------------------------|---------------|-----------------|----------------|--------------------------|-------------------------------|
| <i>Cyc1</i>  | GATGTCGCCA<br>CCTTCCTTCGC     | 136           | 6, 7            | NM_025567.2    | 98.6%                    | 0.99                          |
|              | GGA CTGACCAC<br>TTATGCCGCTTC  |               |                 |                |                          |                               |
| <i>Ddx52</i> | CACAGCAGCAG<br>CGAGATAACAC    | 177           | 10-11, 11-12    | NM_030096      | 107.0%                   | 0.99                          |
|              | CTCTTCCAGTCCG<br>ACCTATCCTATG |               |                 |                |                          |                               |
| <i>Lgr6</i>  | TCAGGGAACC<br>ACCTCTCACA      | 113           | 3, 4            | NM_001033409   | 92.0%                    | 0.95                          |
|              | CATAGTGCCT<br>CTGCTGGGAT      |               |                 |                |                          |                               |
| <i>Mki67</i> | CAGAAGAAATG<br>GAAGCCAAAA     | 110           | 12, 13          | NM_001081117.2 | 96.5%                    | 0.99                          |
|              | TGCAGATGCA<br>TCAA ACTTGG     |               |                 |                |                          |                               |
